# Supplementary material for: Exquisite restructuring of the electronic structure of cobalt phosphide via rationally controlling iron induction for water splitting under industrial conditions
Source: Royal Society of Chemistry journal article supplement (doi:10.1039/d4ta08129c), 2025-01-01
Supplement: d4ta08129c1.pdf [file d4ta08129c1.pdf]

**Electronic Supplementary Information (ESI)**

**Electronic structure exquisite restructuring of cobalt phosphide via rationally  
controlling iron induction for water splitting at industrial condition**

Ziting Li,<sup>a</sup> Peng Zhou,<sup>a</sup> Mingyan Zhang,<sup>a</sup> Haochen Zhang,<sup>a</sup> Yongyi Zhang,<sup>a</sup> Dan  
Han,<sup>a</sup> Xiaoshuang Chen<sup>\*ab</sup>

<sup>a</sup>College of Chemistry and Chemical Engineering, Qiqihar University, Qiqihar  
161006, P. R. China

<sup>b</sup>Heilongjiang Provincial Key Laboratory of Surface Active Agent and Auxiliary,  
Qiqihar University, Qiqihar 161006, P. R. China

\*Corresponding author: Tel.: +86 13836265698

E-mail address: cxshuang1988@163.com (X. S. Chen)

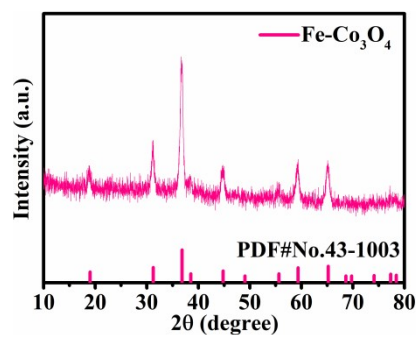

**Fig. S1** XRD pattern of Fe-Co<sub>3</sub>O<sub>4</sub> product.

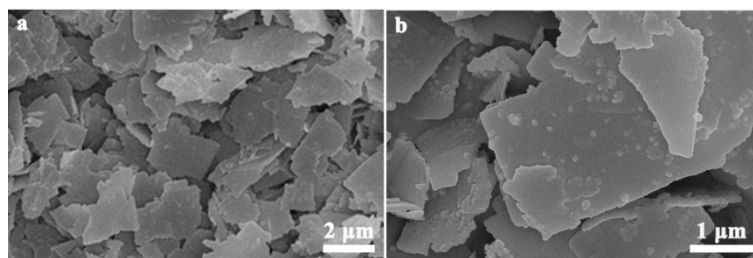

**Fig. S2** (a, b) SEM images of CoP product.

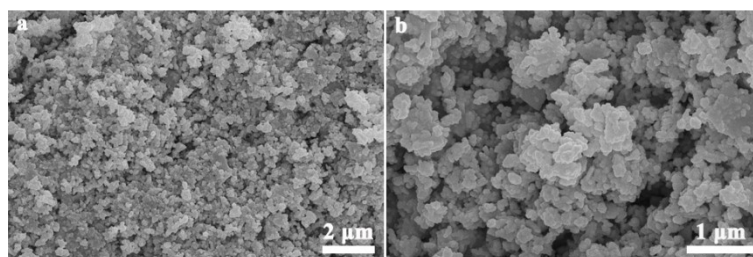

**Fig. S3** (a, b) SEM images of CoP product prepared at 120 °C.

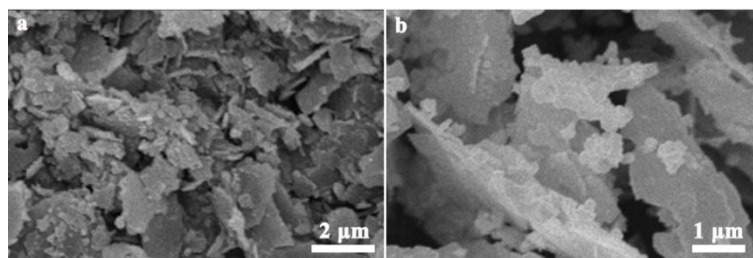

**Fig. S4** (a, b) SEM images of CoP product prepared at 180 °C.

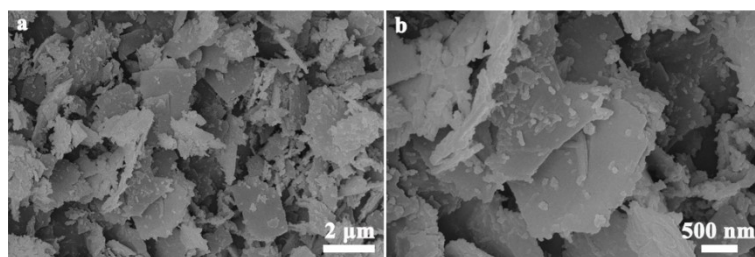

**Fig. S5** (a, b) SEM images of CoP product prepared for 3.0 h.

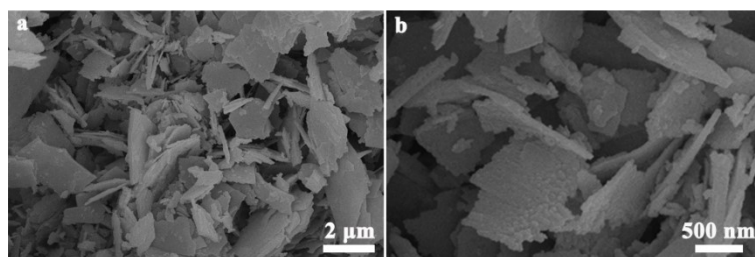

**Fig. S6** (a, b) SEM images of CoP product prepared for 8.0 h.

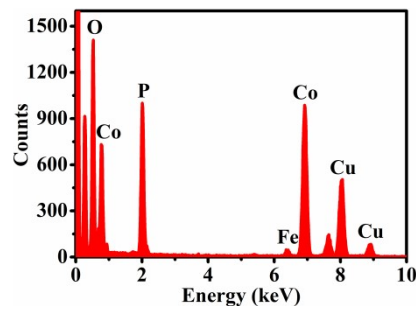

**Fig. S7** EDX spectrum of Fe-CoP product.



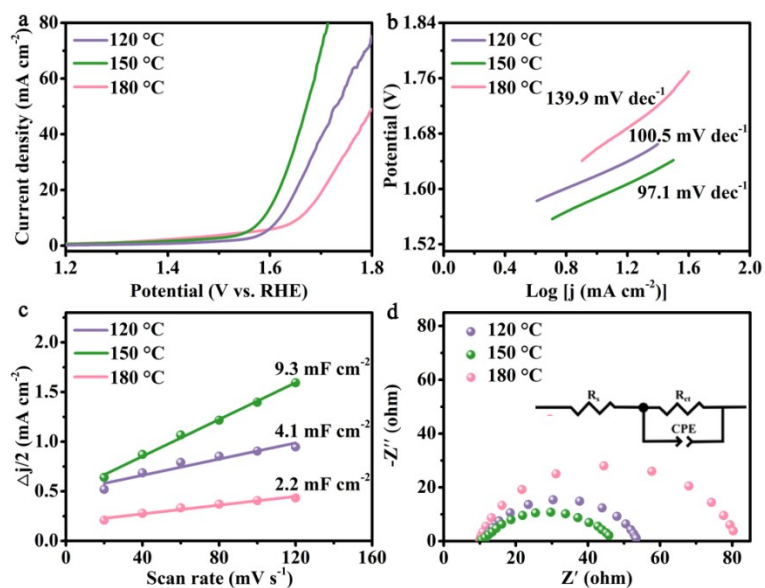

**Fig. S8** OER performance of CoP products prepared at different reaction temperatures.

(a) Polarization, (b) Tafel, (c)  $C_{dl}$  and (d) Nyquist curves.

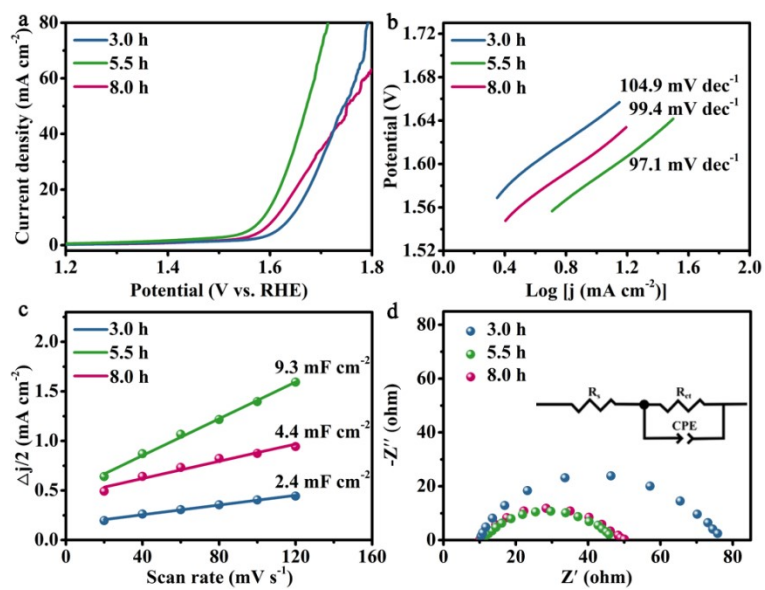

**Fig. S9** OER performance of CoP products prepared for different reaction time. (a)

Polarization, (b) Tafel, (c)  $C_{dl}$  and (d) Nyquist curves.

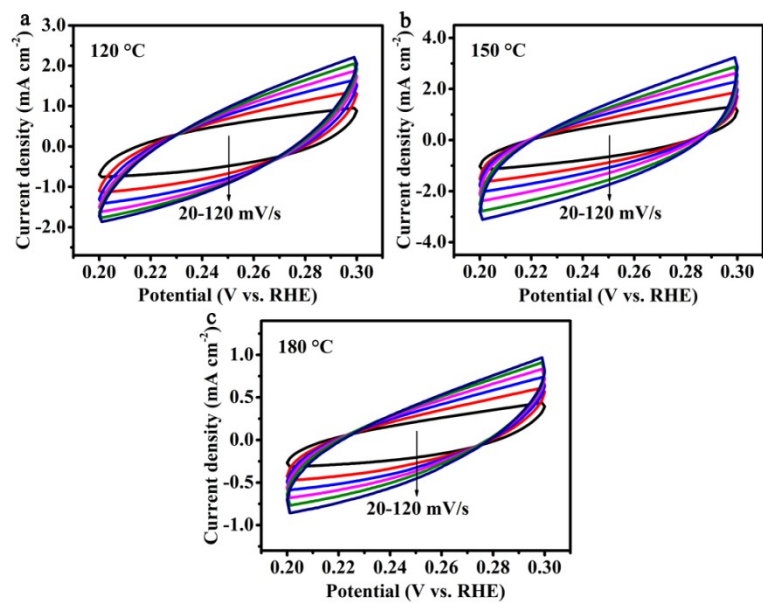

**Fig. S10** OER cyclic voltammograms of CoP products prepared at different reaction temperatures.

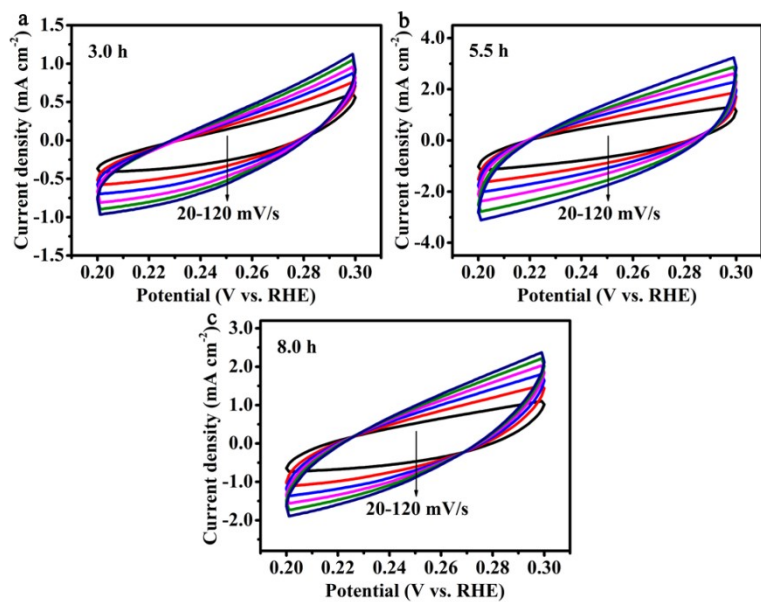

**Fig. S11** OER cyclic voltammograms of CoP products prepared at different reaction time.

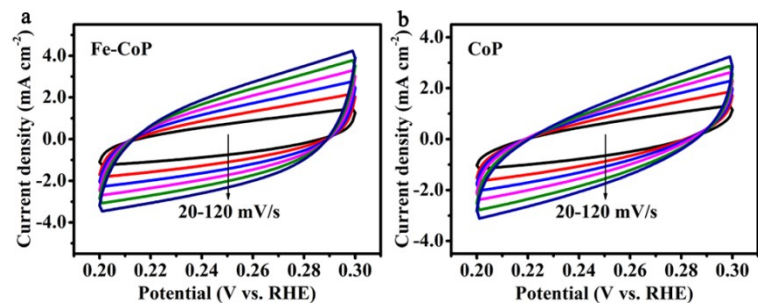

**Fig. S12** OER cyclic voltammograms of (a) Fe-CoP and (b) CoP products at different scan rates.

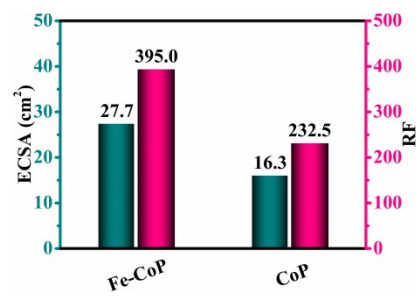

**Fig. S13** OER ECSA and RF comparison of Fe-CoP and CoP products.

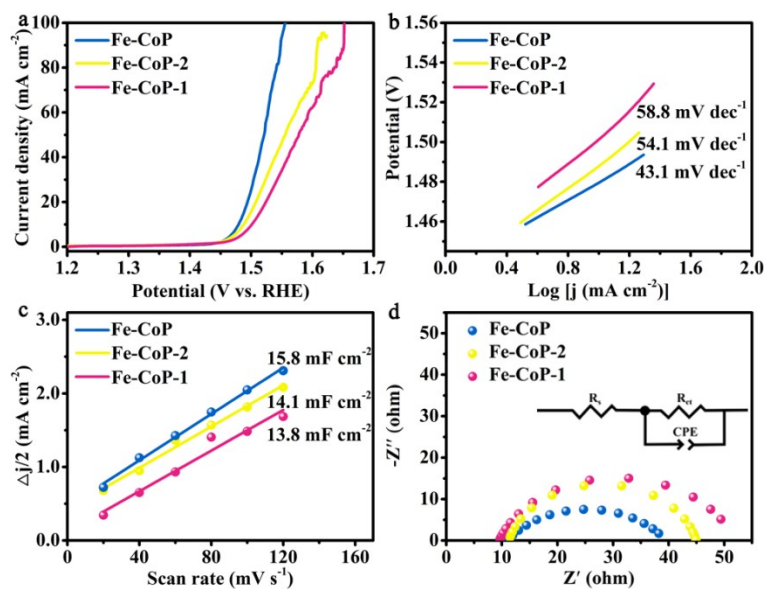

**Fig. S14** OER performance of Fe-CoP products prepared with different Fe contents.

(a) Polarization, (b) Tafel, (c) C<sub>dl</sub> and (d) Nyquist curves.

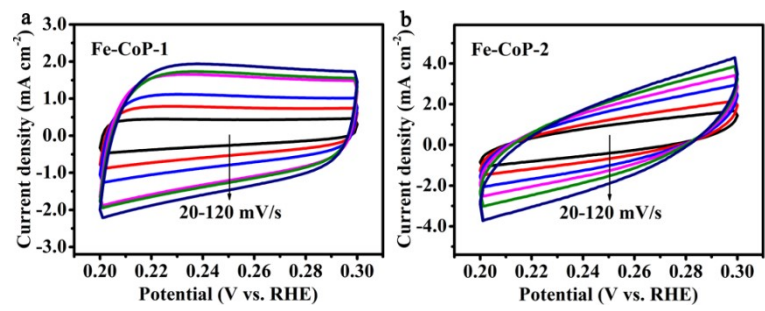

**Fig. S15** OER cyclic voltammograms of Fe-CoP products prepared with different Fe contents.



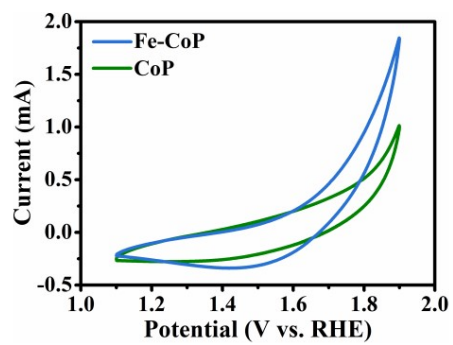

**Fig. S16** OER cyclic voltammograms of Fe-CoP and CoP products in 1.0 M PBS with the scan rate of 100 mV s<sup>-1</sup>.

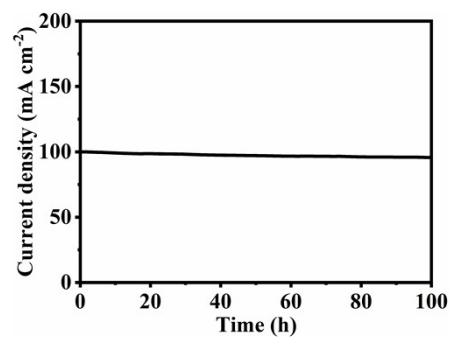

**Fig. S17** I-t curve of Fe-CoP product at 100 mA cm<sup>-2</sup>.

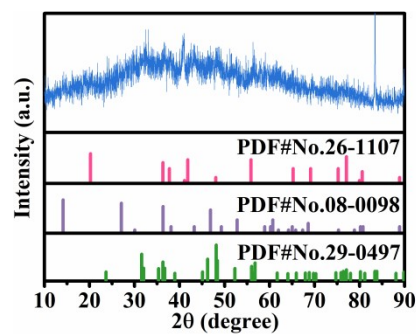

**Fig. S18** XRD pattern of Fe-CoP after OER.

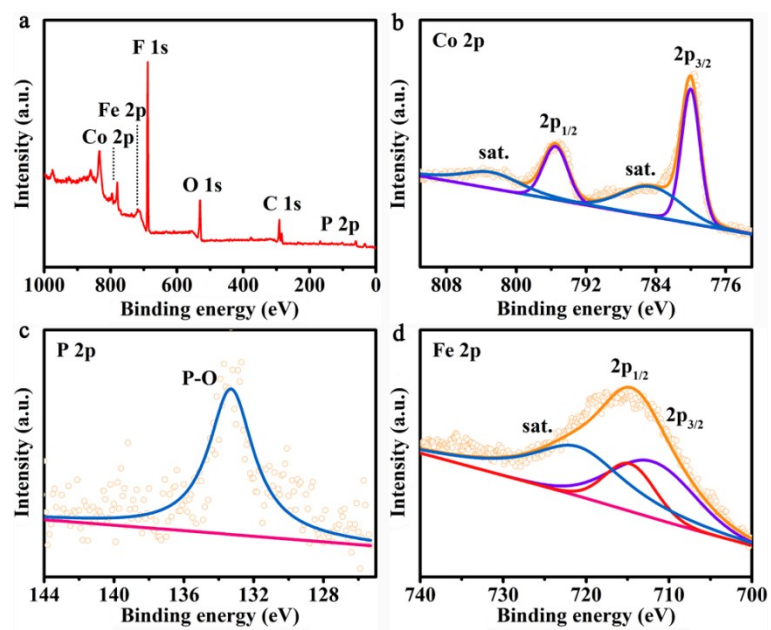

**Fig. S19** XPS analysis of Fe-CoP after OER. (a) Survey spectrum, high resolution (b) Co 2p, (c) P 2p, (d) Fe 2p XPS spectra.

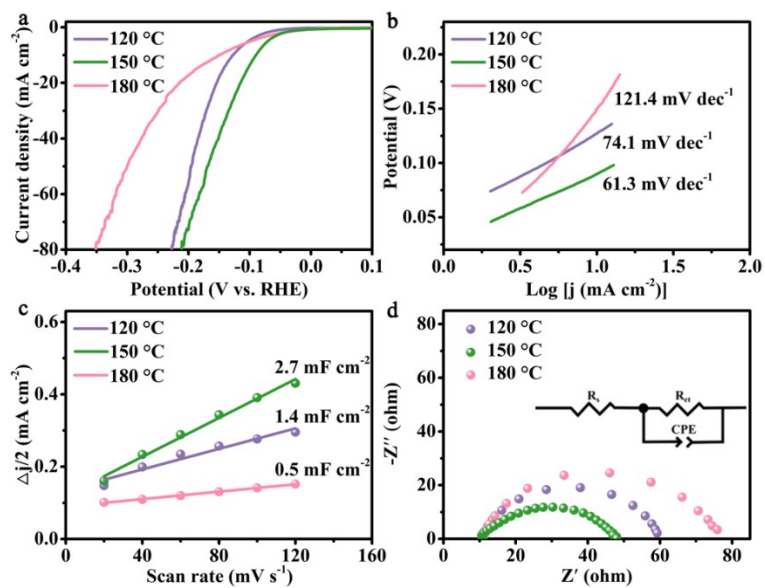

**Fig. S20** HER performance of CoP products prepared at different reaction temperatures. (a) Polarization, (b) Tafel, (c)  $C_{dl}$  and (d) Nyquist curves.

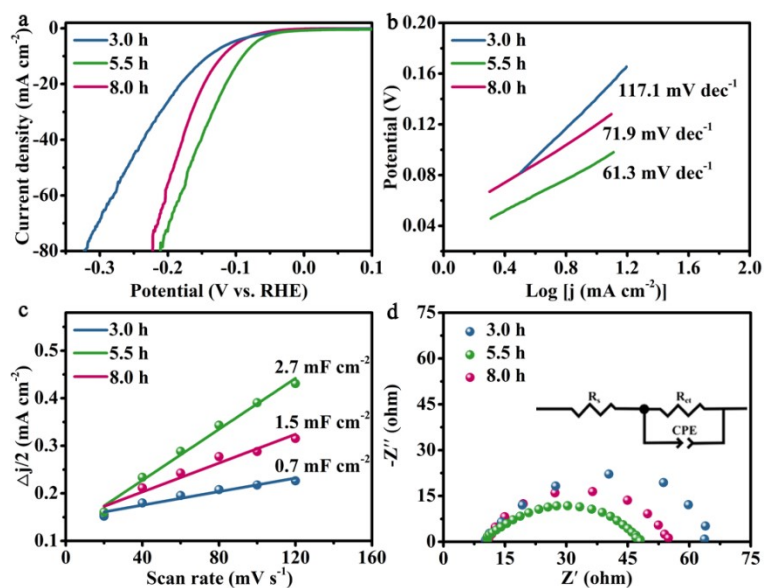

**Fig. S21** HER performance of CoP products prepared for different reaction time. (a) Polarization, (b) Tafel, (c)  $C_{dl}$  and (d) Nyquist curves.

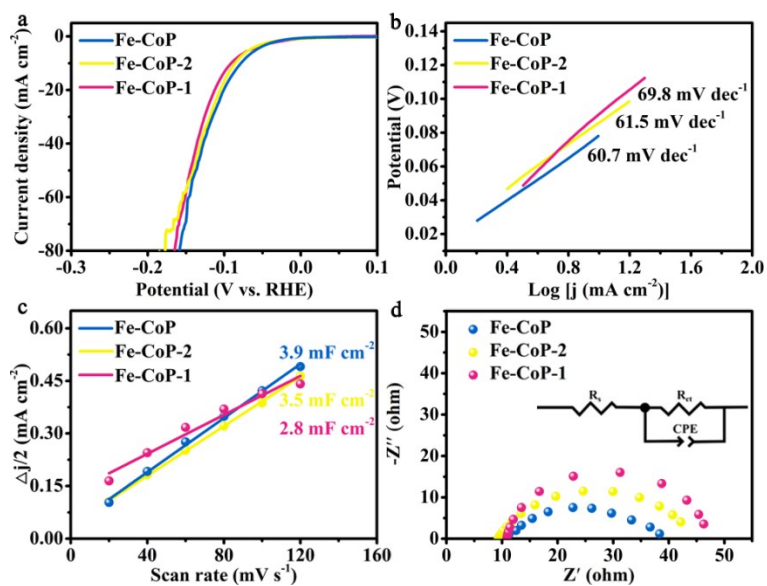

**Fig. S22** HER performance of Fe-CoP products prepared with different Fe contents.

(a) Polarization, (b) Tafel, (c)  $C_{dl}$  and (d) Nyquist curves.

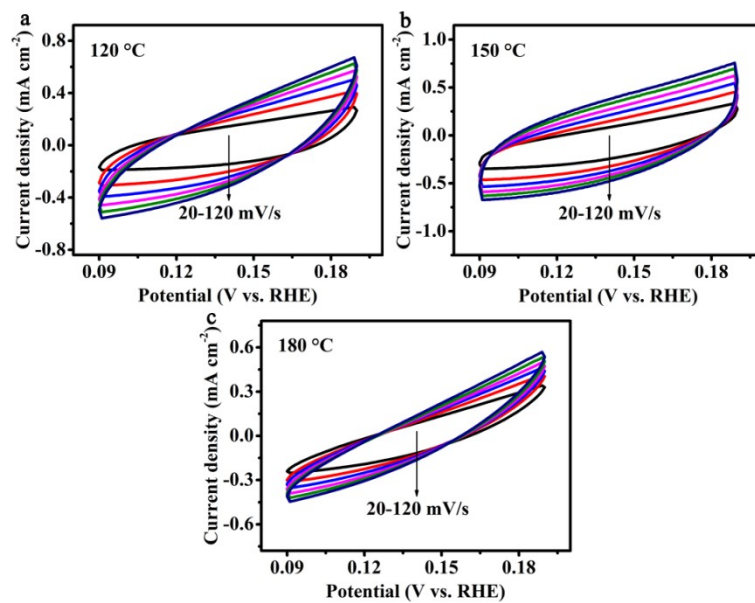

**Fig. S23** HER cyclic voltammograms of CoP products prepared at different reaction temperatures.



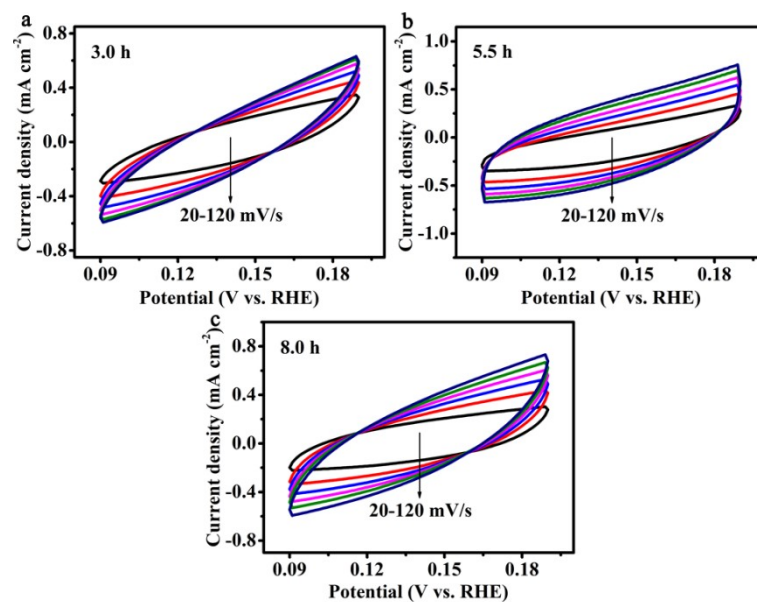

**Fig. S24** HER cyclic voltammograms of CoP products prepared at different reaction time.

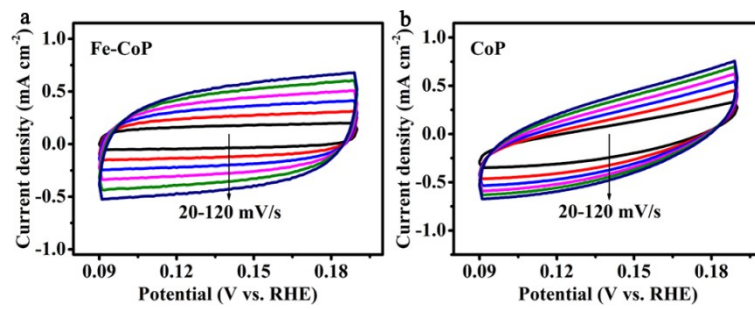

**Fig. S25** HER cyclic voltammograms of (a) Fe-CoP and (b) CoP products at different scan rates.

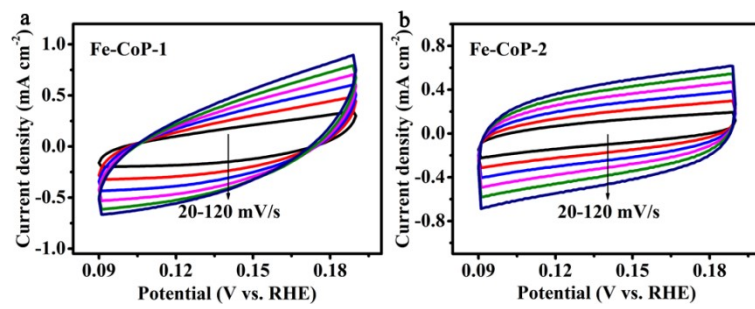

**Fig. S26** HER cyclic voltammograms of Fe-CoP products prepared with different Fe contents.

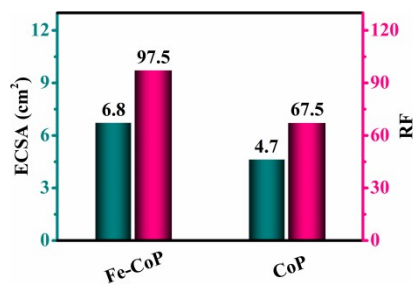

**Fig. S27** HER ECSA and RF comparison of Fe-CoP and CoP products.

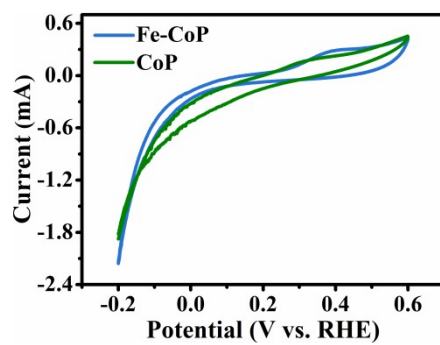

**Fig. S28** HER cyclic voltammograms of Fe-CoP and CoP products in 1.0 M PBS with the scan rate of 100 mV s<sup>-1</sup>.

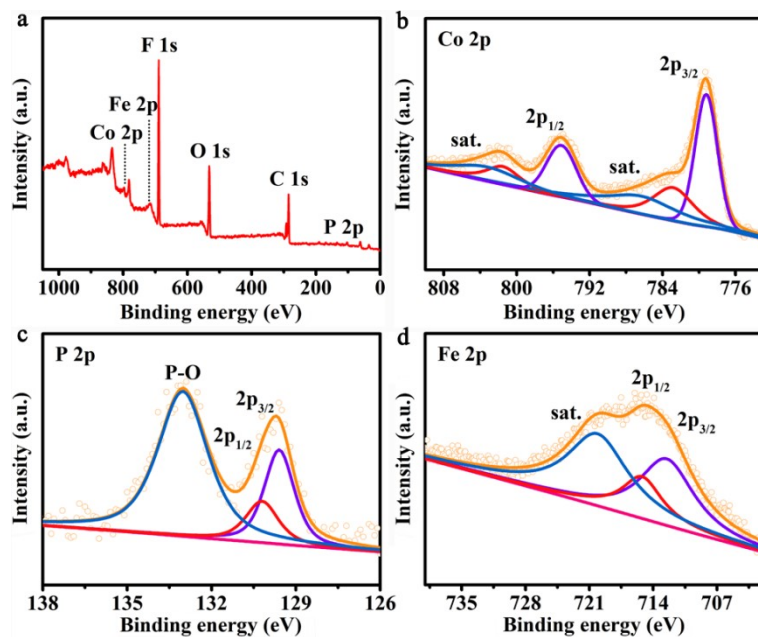

**Fig. S29** XPS analysis of Fe-CoP after HER. (a) Survey spectrum, high resolution (b) Co 2p, (c) P 2p, (d) Fe 2p XPS spectra.

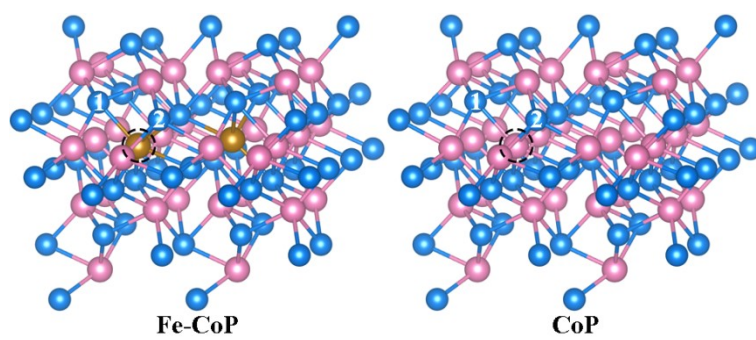

**Fig. S30** Charge density distribution diagrams of Fe-CoP and CoP.

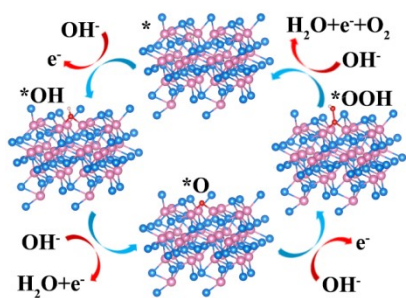

**Fig. S31** Evolution step and adsorbent model of CoP for OER.



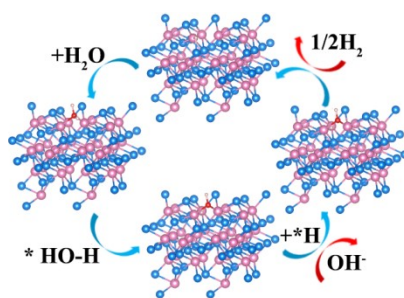

**Fig. S32** Evolution step and adsorbent model of CoP for HER.

**Table S1** Comparison of OER performance for Fe-CoP with recently reported electrocatalysts.

| Catalysts                        | Overpotential<br>(mV) | Ref.                                         |
|----------------------------------|-----------------------|----------------------------------------------|
| Fe-CoP                           | 249                   | This work                                    |
| Zn <sub>0.1</sub> -CoP           | 290                   | J. Alloys Compd. 2023, 934, 167828           |
| Co <sub>2</sub> P-FeP@C-15       | 260                   | J. Colloid Interface Sci. 2024, 653, 857-866 |
| MoP@NPC                          | 313                   | J. Mater. Chem. A 2024, 12, 1243             |
| MoP/CoMoP <sub>2</sub> @NPC      | 284                   | Int. J. Hydrogen Energy 2024, 90, 1401-1410  |
| Fe-CoP                           | 269                   | 1410                                         |
| Hf-XO-CoP                        | 292                   | Inorg. Chem. 2024, 63, 13093-13099           |
| CoP                              | 388                   |                                              |
| Fe-CoP NFs                       | 255                   | Energy Environ. Mater. 2024, 7, e12747       |
| Fe-CoP NCs                       | 300                   |                                              |
| CoP/Ni <sub>2</sub> P@NHPC       | 275                   | J. Electroanal. Chem. 2024, 961, 118224      |
| MoCoFeP                          | 250                   | RSC Adv. 2024, 14, 10182-10190               |
| Fe-CoP/NCNF-350                  | 292                   | Int. J. Hydrogen Energy 2024, 63, 556-565    |
| CN/Fe-CoS <sub>2</sub>           | 304                   | ACS Appl. Nano Mater. 2024, 7, 9685-9695     |
| H-Fe <sub>3</sub> O <sub>4</sub> | 287                   | J. Colloid Interface Sci. 2024, 657, 684-694 |

**Table S2** Comparison of HER performance for Fe-CoP with recently reported electrocatalysts.

| Catalysts                                            | Overpotential<br>(mV) | Ref.                                            |
|------------------------------------------------------|-----------------------|-------------------------------------------------|
| Fe-CoP                                               | 78.5                  | This work                                       |
| NF/Ni <sub>2</sub> P/CoP-NN                          | 90                    | Electrochim. Acta 2022, 426, 140768             |
| NF/Ni <sub>2</sub> P                                 | 172                   |                                                 |
| Ni <sub>2</sub> P/CoP@C-NSG                          | 145                   | Mater. Today Sustainability 2024, 25,<br>100677 |
| V-CoP                                                | 98                    | Nanoscale Adv. 2023, 5, 4133-4139               |
| CoP                                                  | 149                   |                                                 |
| Fe <sub>1.5</sub> -CoP                               | 115                   | Ionic 2022, 28, 2301-2307                       |
| Fe <sub>1</sub> -CoP                                 | 142                   |                                                 |
| O-CoP                                                | 125                   | Chem. Eur. J. 2023, 29, e202301252              |
| B-CoP/NC                                             | 158                   | New J. Chem. 2023, 47, 17333                    |
| CoP@NCDs <sub>0.5</sub> /NF                          | 103                   | J. Cryst. Growth 2023, 624, 127430              |
| CoP/NF                                               | 137                   |                                                 |
| Ni-CoP/Co <sub>2</sub> P                             | 125                   | J. Solid State Chem. 2021, 301, 122299          |
| CoP/Co <sub>2</sub> P                                | 204                   |                                                 |
| Mo-CoP/Ti <sub>3</sub> C <sub>2</sub> T <sub>x</sub> | 117                   | ChemistrySelect 2022, 7, e202200254             |

**Table S3** Comparison of overall water splitting performance for Fe-CoP with recently reported electrolyzers.

| Catalysts                                              | Voltage (V) | Ref.                                              |
|--------------------------------------------------------|-------------|---------------------------------------------------|
| Fe-CoP                                                 | 1.50        | This work                                         |
| Mn-W-CoP/NF                                            | 1.57        | Int. J. Hydrogen Energy 2024, 51, 276-284         |
| CoP/CNTs/CC                                            | 1.54        | J. Colloid Interface Sci. 2023, 651, 172-181      |
| CoFe-P/NF-1                                            | 1.57        | ACS Appl. Nano Mater. 2021, 4, 12083-12090        |
| CoO-CoP-NC                                             | 1.53        | J. Mater. Chem. A 2023, 11, 3136                  |
| NiSe <sub>2</sub> /Ni <sub>2</sub> P@FeP               | 1.554       | J. Power Source 2020, 445, 227294                 |
| H-Fe <sub>3</sub> O <sub>4</sub> @FeP@NC               | 1.69        | J. Colloid Interface Sci. 2024, 657, 684-694      |
| N, Ce-NiCoP/NF                                         | 1.54        | Nano Res. 2024, 17, 282-289                       |
| Ni <sub>2</sub> P-MoP@NC                               | 1.54        | J. Mater. Chem. A 2023, 11, 15033                 |
| Co <sub>3</sub> Mo <sub>3</sub> N/Co <sub>4</sub> N/Co | 1.58        | Angew. Chem. Int. Ed. 2024, 63, e202319239        |
| Co <sub>2</sub> P-NCS                                  | 1.69        | Small 2024, 20, 2308956                           |
| Co-N-BP-CNTs/NF                                        | 1.52        | J. Alloys Compd. 2024, 980, 173647                |
| Ir <sub>n</sub> -CoMoPO <sub>x</sub>                   | 1.53        | ACS Appl. Mater. Interfaces 2024, 16, 7141-7151   |
| CoP <sub>2</sub> /Co <sub>2</sub> P@CNT-CC             | 1.55        | ACS Appl. Mater. Interfaces 2022, 14, 56847-56855 |
| V-CoP                                                  | 1.59        | Adv. Energy Mater. 2021, 11, 2101758              |

**Table S4** Charge density distribution analysis and their diversities to purely ionic models ( $\Delta Q$ ).

| Catalysts | Atoms          | Charge | $\Delta Q$ |
|-----------|----------------|--------|------------|
| CoP       | P <sub>1</sub> | 5.18   | 0.18       |
|           | P <sub>2</sub> | 5.18   | 0.18       |
|           | Co             | 8.84   | -0.16      |
| Fe-CoP    | P <sub>1</sub> | 5.21   | 0.21       |
|           | P <sub>2</sub> | 5.21   | 0.21       |
|           | Fe             | 7.73   | -0.27      |
